# Supplementary material
Source: PubMed Central journal article supplement (PMC2929119)
Supplement: tpc.110.074492_1.pdf [file tpc.110.074492_1.pdf]

**Spatial uncoupling of mitosis and cytokinesis during appressorium-mediated plant infection by the rice blast fungus *Magnaporthe oryzae***

**Diane G. O. Saunders, Yasin F. Dagdas and Nicholas J. Talbot**

**Supplemental Data**

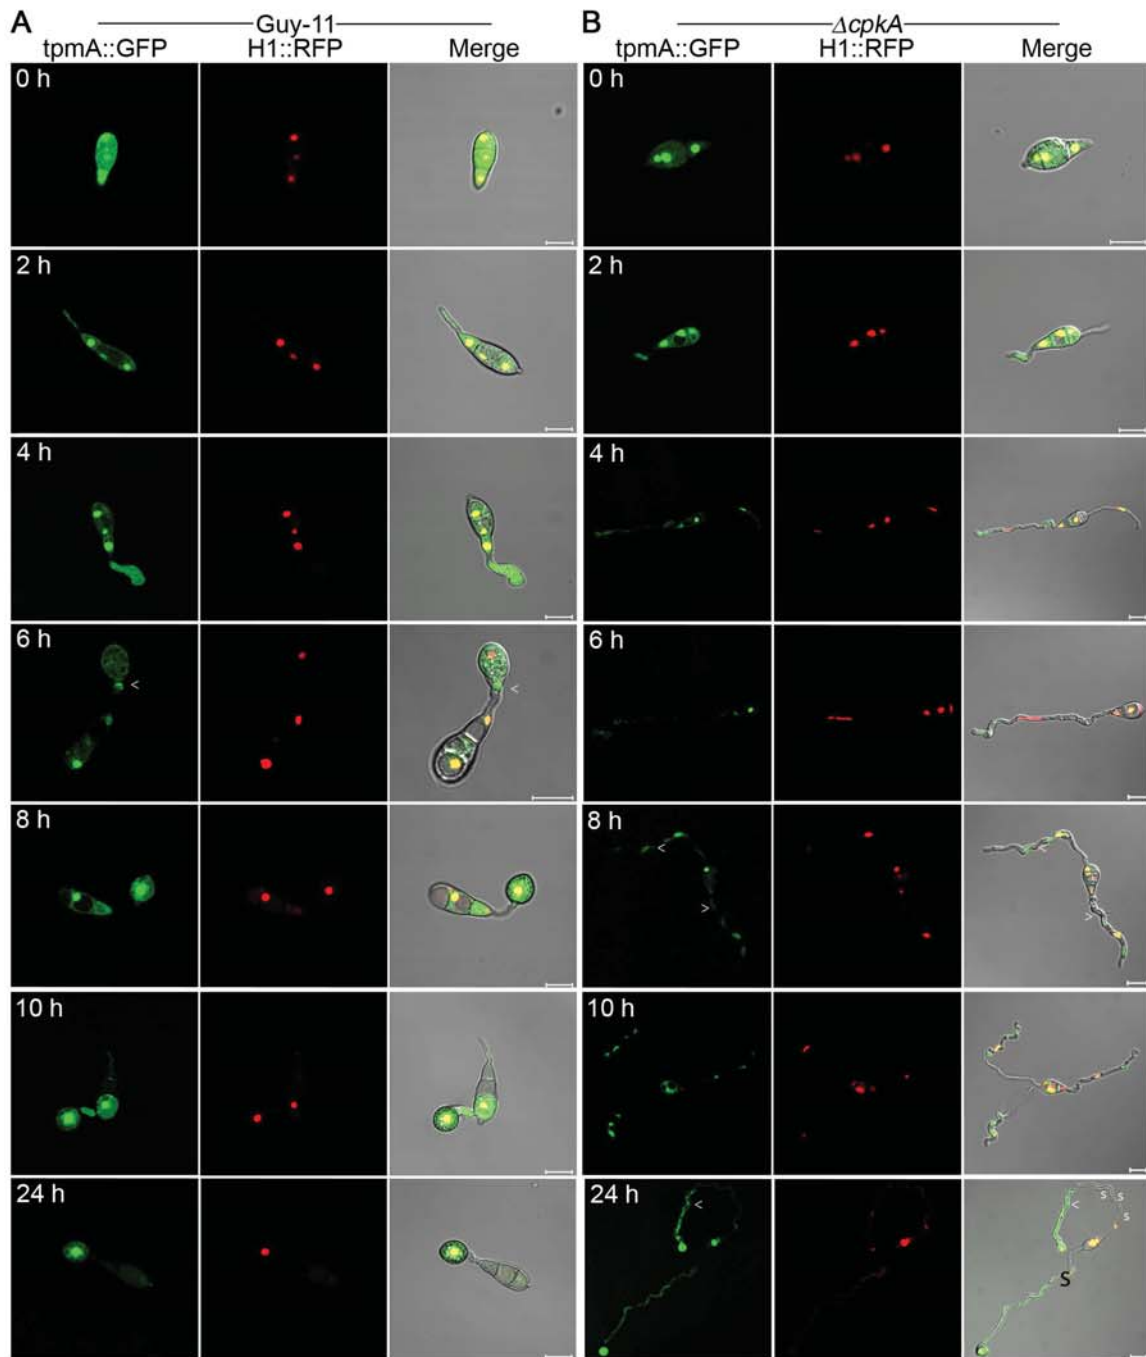

Supplemental Figure 1. Live cell imaging of nuclear dynamics and actomyosin ring formation in the *M. oryzae* strains Guy-11 and  $\Delta cpkA$ .

Time series of micrographs to show nuclear division and cytokinesis during appressorium formation. Conidial suspensions were prepared from the *M. oryzae* Guy-11 (A) and a  $\Delta cpkA$  mutant (B), expressing H1:eRFP and *tpmA::GFP*. The suspensions were incubated in conditions to allow appressorium formation and representative images recorded at seven time points during germination and appressorium formation. Septa are highlighted by arrowheads. Scale bars represent 10  $\mu$ m.

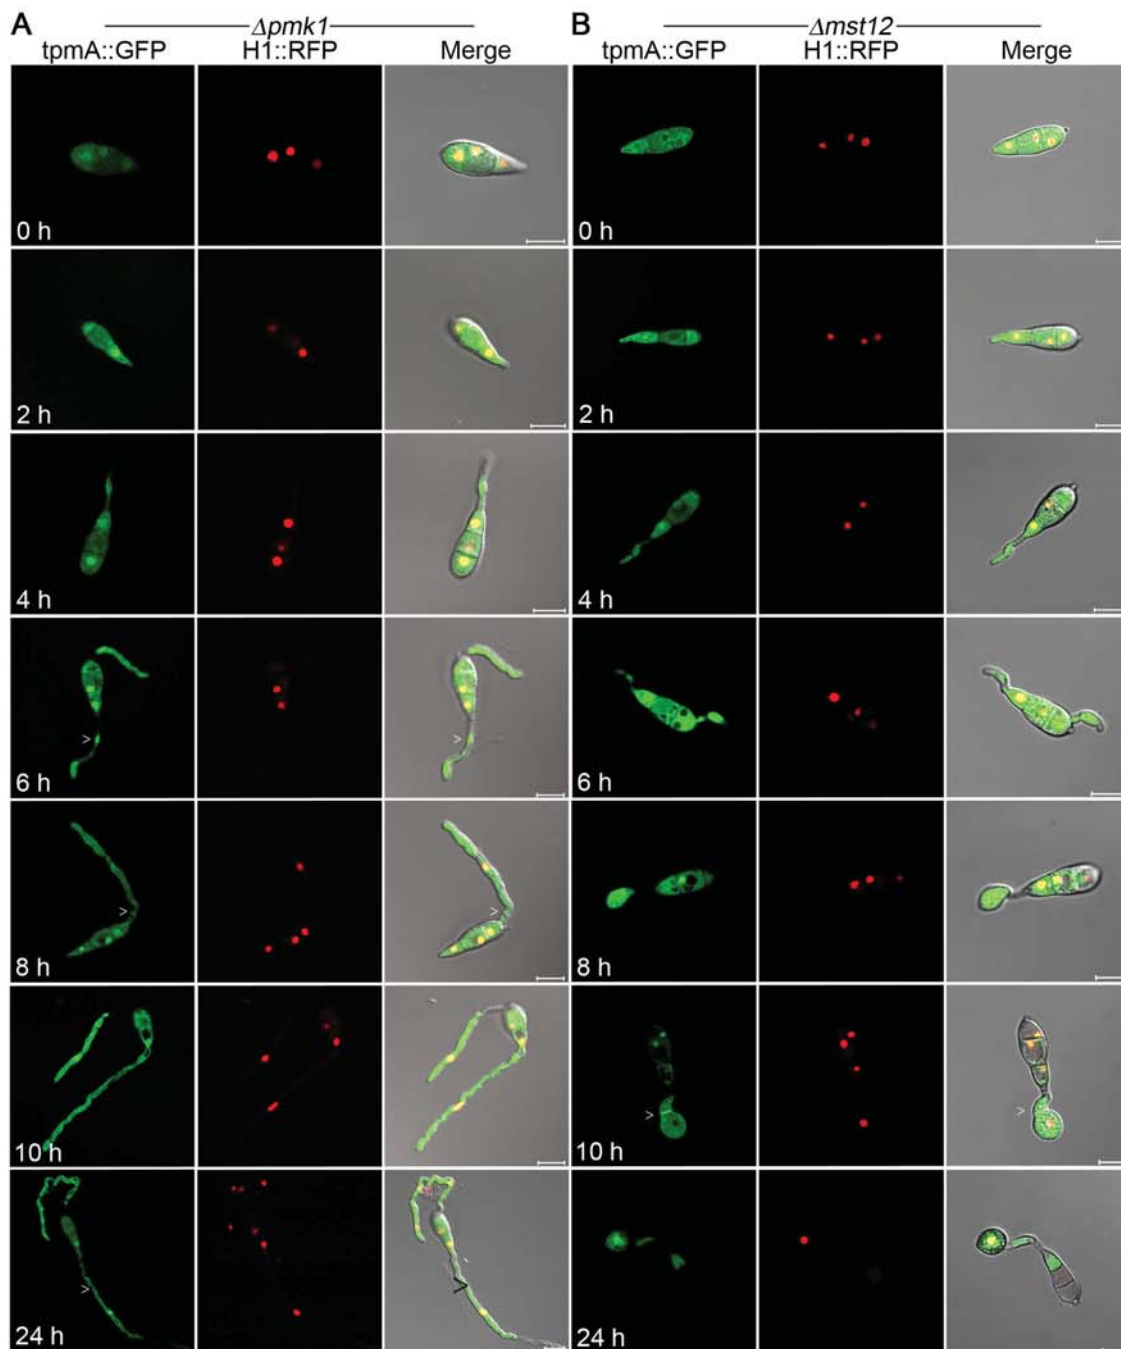

Supplemental Figure 2. Live cell imaging of nuclear dynamics and actomyosin ring formation in the *M. oryzae* strains  $\Delta pmk1$  and  $\Delta mst12$ .

Time series of micrographs to show nuclear division and cytokinesis during appressorium formation. Conidial suspensions were prepared from the *M. oryzae*  $\Delta pmk1$  (A) and  $\Delta mst12$  (B) mutants, expressing H1:eRFP and tpmA:GFP. The suspensions were incubated to allow appressorium formation and representative images recorded at seven time points during germination and appressorium formation. Septa are highlighted with arrowheads. Scale bars represent 10  $\mu m$ .

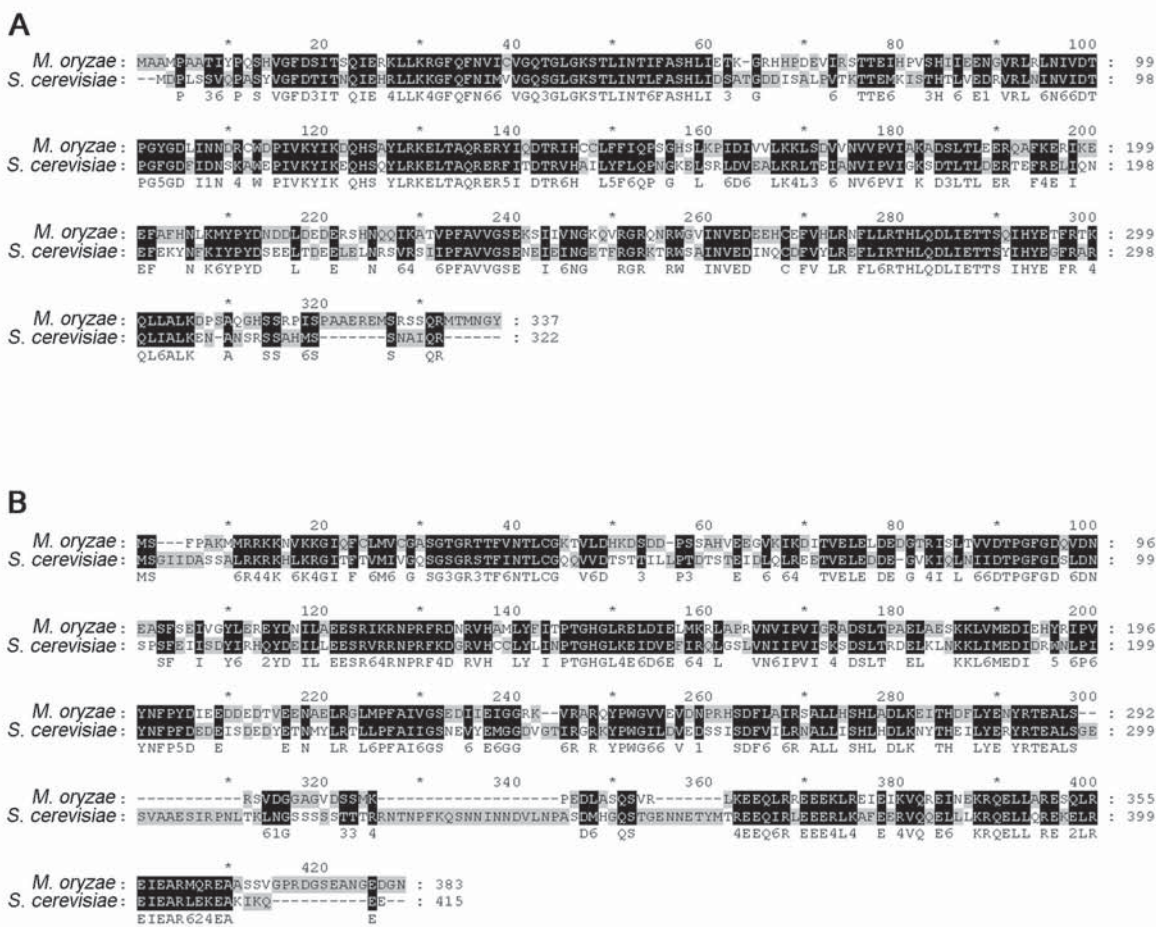

Supplemental Figure 3. Alignment of the predicted *M. oryzae* Sep4 and Sep5 amino acid sequences with Cdc10 and Cdc11 from *S. cerevisiae*.

The alignment was generated using ClustalW and shaded using Boxshade v 2.01. Numbers on the right indicate amino acid residue positions. Residues within a black background, dark grey background and light grey background indicate 100%, 80% and 60% amino acid conservation.

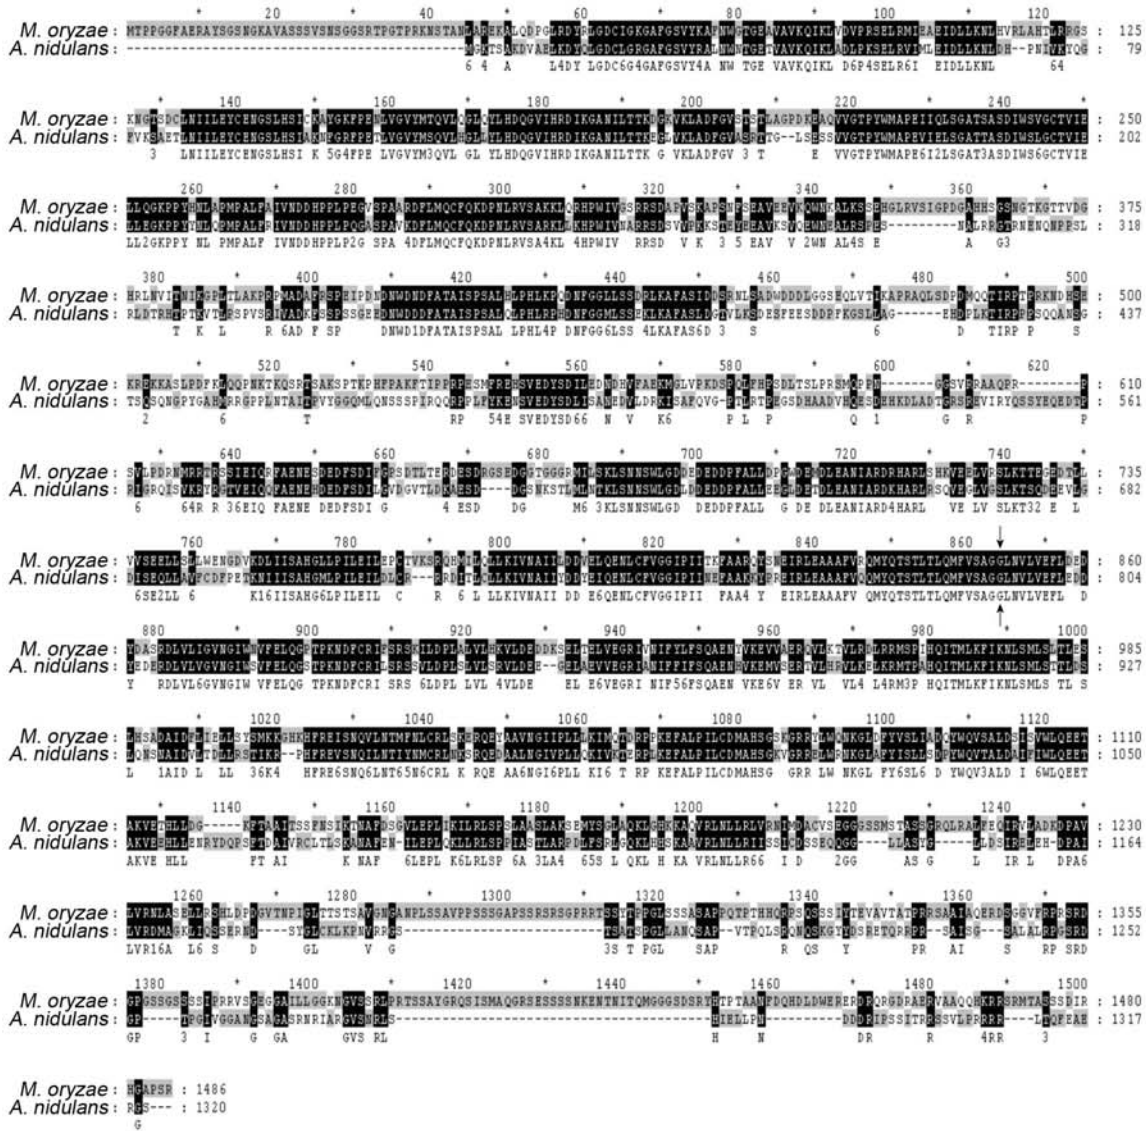

Supplemental Figure 4. Alignment of the predicted *M. oryzae* Sep1 amino acid sequence with *A. nidulans* SepH.

The alignment was generated using ClustalW and shaded using Boxshade v 2.01. Numbers on the right indicate amino acid residue positions. Residues within a black background, dark grey background and light grey background represent 100%, 80% and 60% amino acid conservation. Arrow indicates position of nucleotide substitution.

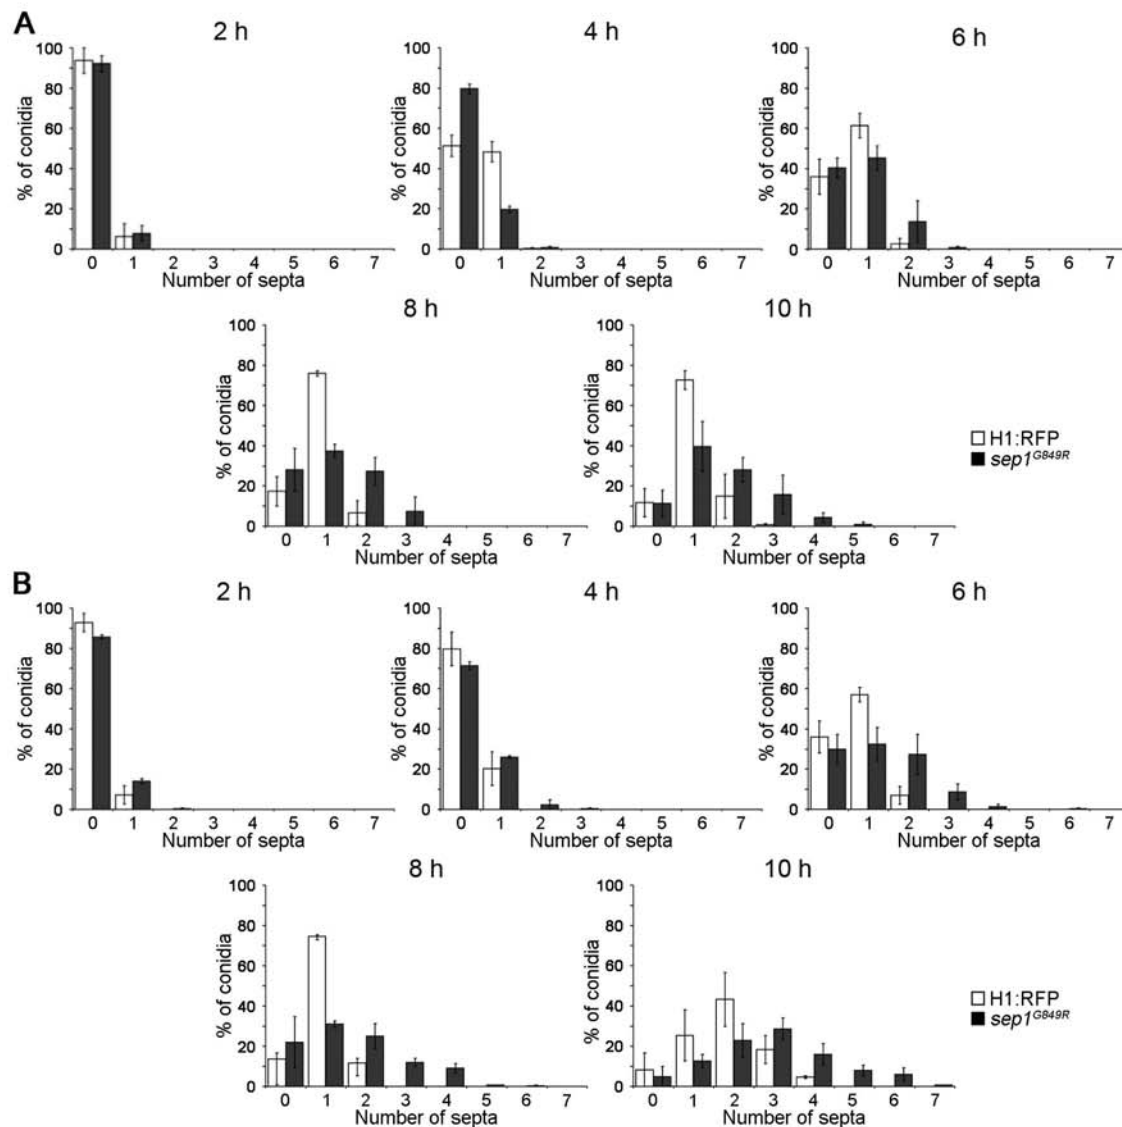

Supplemental Figure 5. A temperature-sensitive mutation in *M. oryzae* SEP1 increases septation frequency during appressorium formation.

Quantitative analysis of septum formation during appressorium formation in *sep1G849R*. Conidial suspensions were prepared from the *M. oryzae sep1G849R* and H1:eRFP strains and incubated in conditions to allow appressorium development at a permissive temperature of 24°C (A) or after an initial incubation for 1 hour at 24°C germinating conidia were transferred to the semi-restrictive temperature of 29°C (B). The number of septa within the germ tube was determined by calcofluor white staining and epifluorescence microscopy. Error bars are 1 standard error.

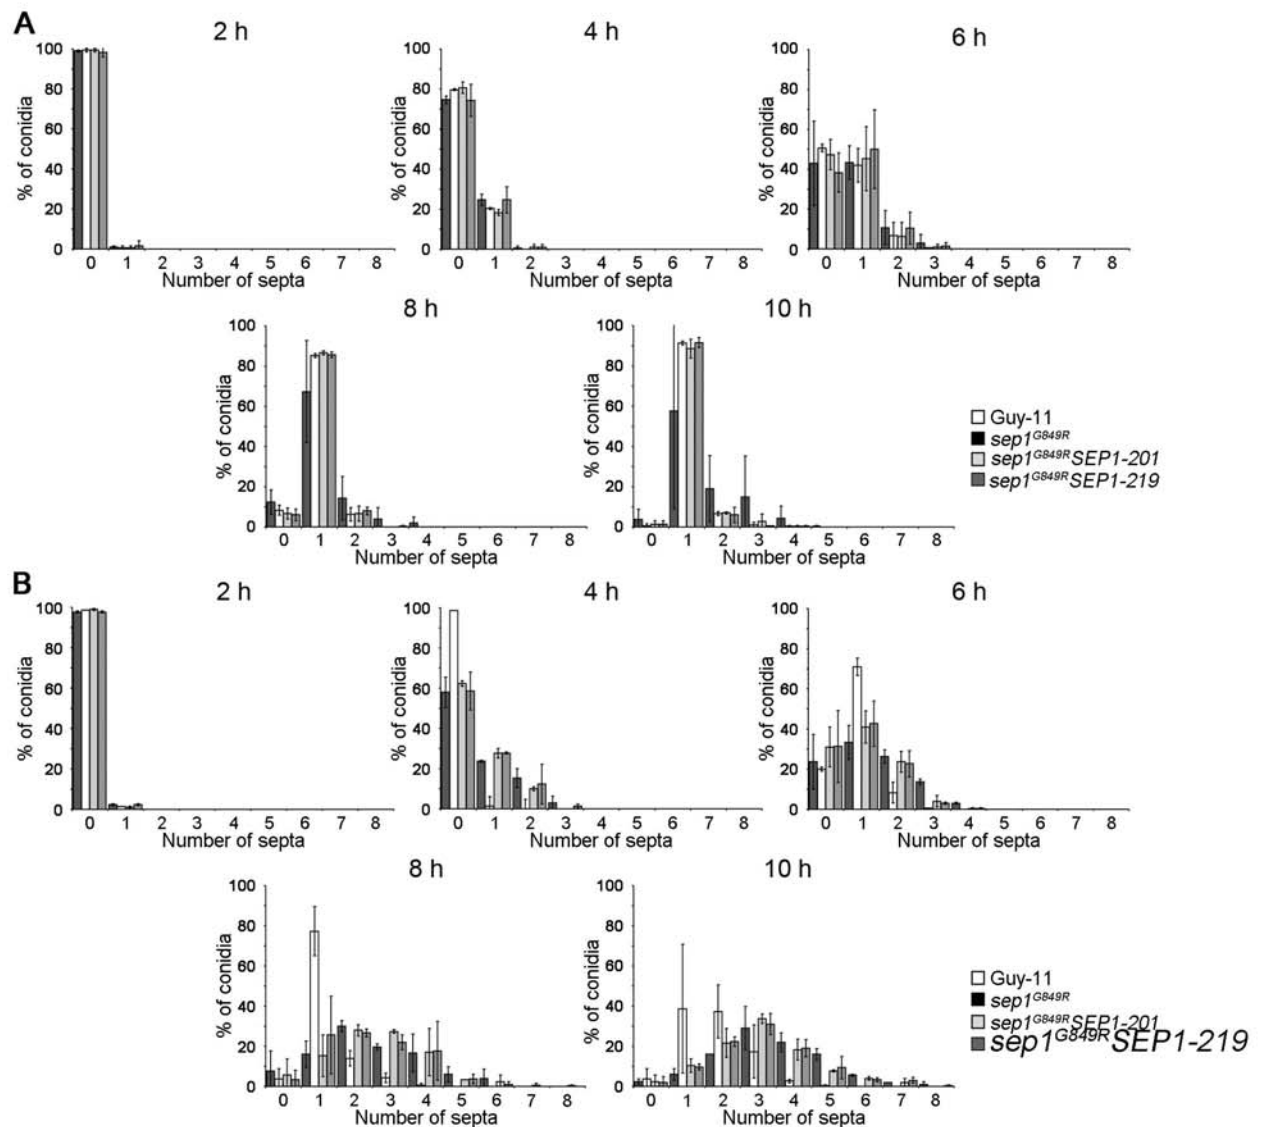

Supplemental Figure 6. The *sep1*<sup>G849R</sup> allele increases the frequency of septation during appressorium development even in the presence of a wild type copy of *SEP1*.

Bar charts to show number of septa present during appressorium development of *M. oryzae*. Conidial suspensions were prepared from two transformants carrying both a wild type copy of *SEP1* and the temperature-sensitive *sep1*<sup>G849R</sup> allele -strains *sep1*<sup>G849R</sup> *SEP1*-201, *sep1*<sup>G849R</sup> *SEP1*-219, as well as a *sep1*<sup>G849R</sup> mutant and the wild type H1:eRFP strain of Guy11. Each *M. oryzae* strain was incubated on hydrophobic borosilicate glass surfaces inductive for appressorium development. The conidial suspensions were incubated at a permissive temperature of 24°C (A) or after an initial incubation for 1 hour at 24°C germinating conidia were transferred to the semi-restrictive temperature of 29°C (B). The number of septa within the germ tube was determined through calcofluor white staining and epifluorescence microscopy. Error bars are 1 standard error.

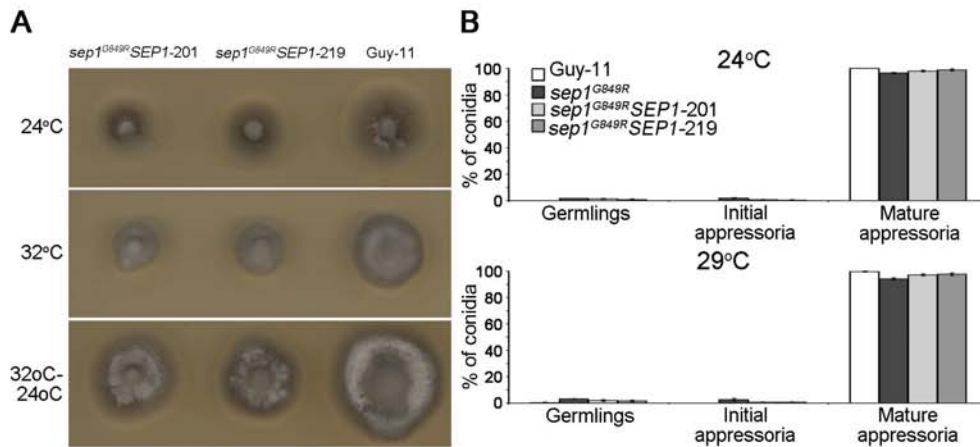

Supplemental Figure 7. The *sep1<sup>G849R</sup>* allele reduces hyphal growth but has no effect on appressorium development even in the presence of a wild type copy of *SEP1*.

A. Plugs of mycelium (5 mm diameter) from *sep1<sup>G849R</sup>SEP1-201*, *sep1<sup>G849R</sup>SEP1-219*, alongside Guy-11, were used to inoculate complete medium agar plates incubated at a permissive temperature of 24°C or a semi-restrictive temperature of 32°C for 4 days. Reversion of any hyphal growth defects was then assessed by transferring plates to the permissive temperature, of 24°C, followed by incubation for a further 3 days. B. Bar charts to show frequency of appressorium development. Conidial suspensions of the two independent *M. oryzae sep1<sup>G849R</sup>SEP1* transformants, alongside Guy-11 and *sep1<sup>G849R</sup>*, were prepared and incubated on hydrophobic borosilicate glass slides inductive for appressorium development at either 24°C or 29°C. Appressorium development was recorded 24 hours post-inoculation (pi).



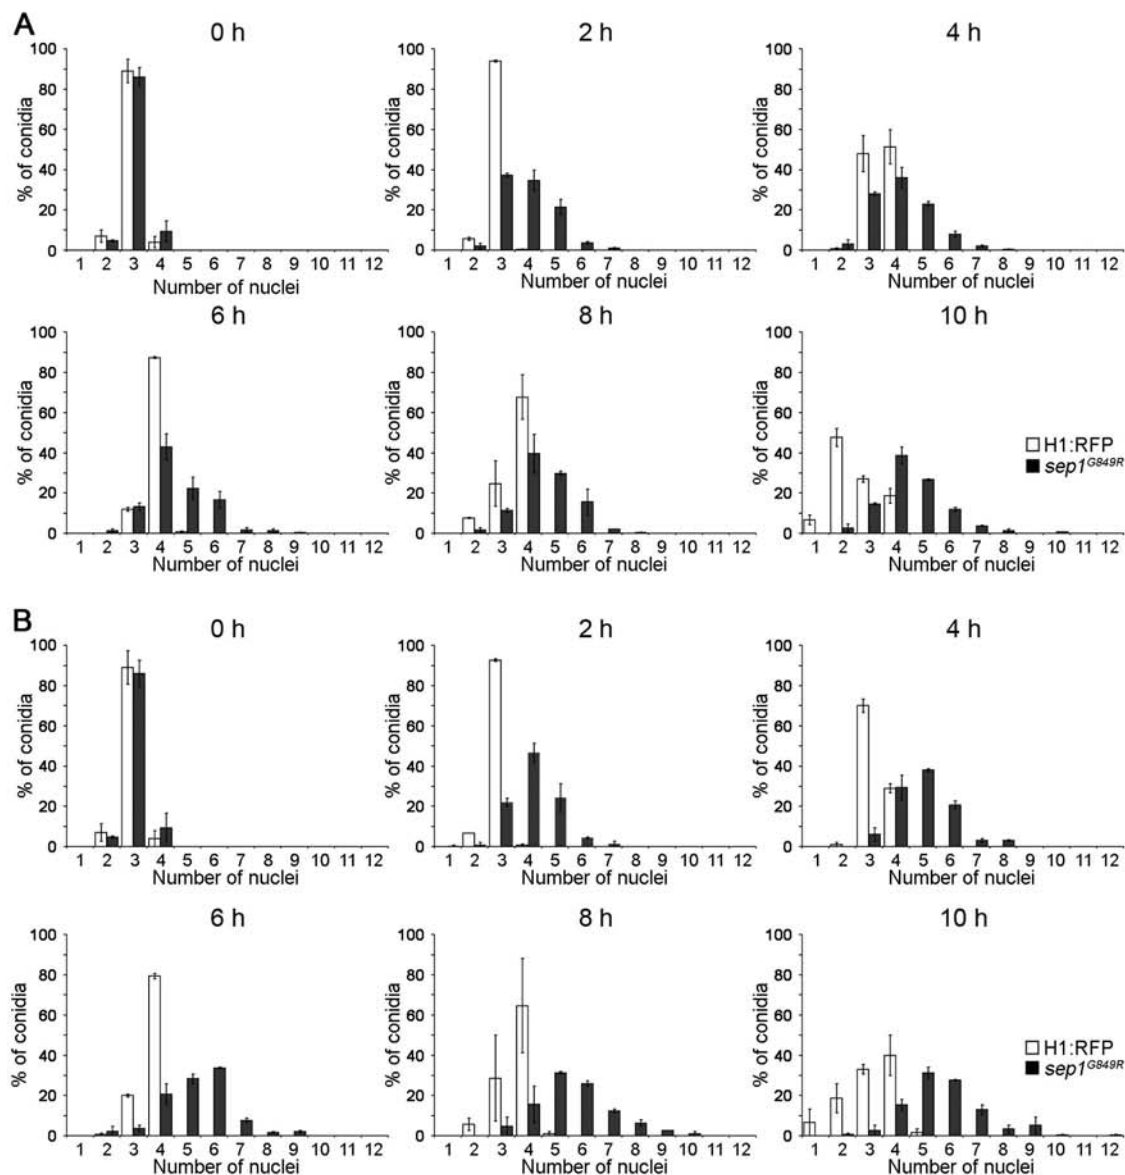

Supplemental Figure 8. A temperature-sensitive mutation in *M. oryzae* SEP1 alleviates the cell cycle arrest phenotype of non-germinating conidial cells during appressorium development.

Bar charts to show number of nuclei present during a time course of appressorium development in *sep1*<sup>G849R</sup> and H1:eRFP. Conidial suspensions were prepared from *sep1*<sup>G849R</sup> and H1:eRFP strains and incubated to allow appressorium development. The conidial suspensions were incubated at a permissive temperature of 24°C (A) or after an initial incubation for 1 hour at 24°C germinating conidia were transferred to the semi-restrictive temperature of 29°C (B). The number of nuclei was determined through epifluorescence microscopy. Error bars are 1 standard error.

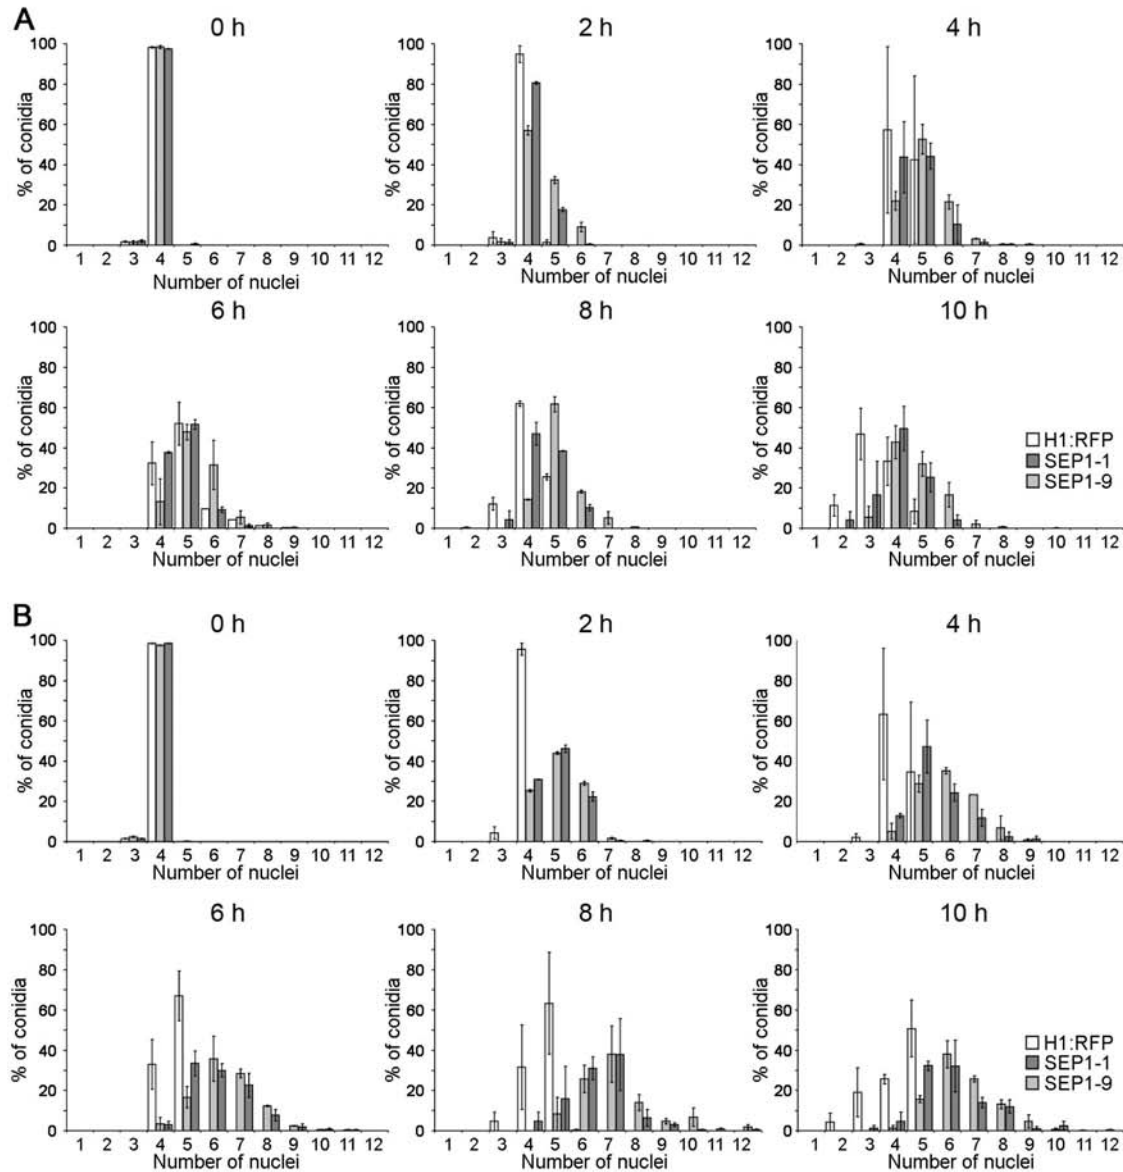

Supplemental Figure 9. Inducible over-expression of *M. oryzae* SEP1 alleviates the cell cycle arrest phenotype of non-germinating conidial cells during appressorium development.

Bar charts to show the number of nuclei present during a time course of appressorium development in the presence or absence of acetate. Conidial suspensions were prepared from the *M. oryzae* SEP1-1, SEP1-9 and H1:RFP strains and incubated in conditions inductive for appressorium development. The conidial suspensions were incubated in the absence (A) or presence (B) of sodium acetate and the number of nuclei was determined through epifluorescence microscopy at various time points during germination and appressorium morphogenesis. Error bars are 1 standard error.

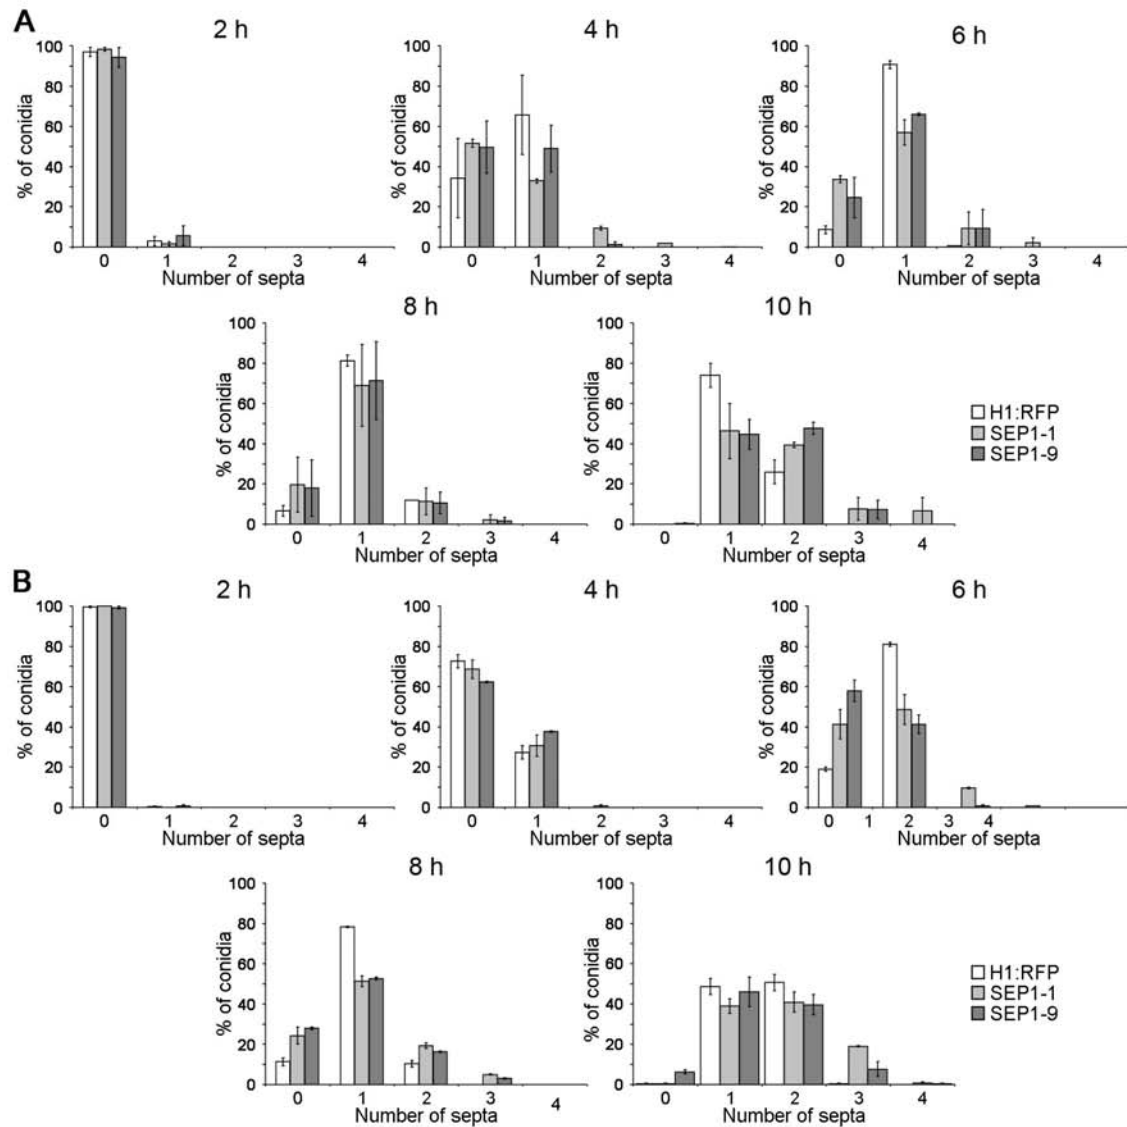

Supplemental Figure 10. Inducible over-expression of *M. oryzae* SEP1 has no effect on septation frequency during appressorium development.

Quantitative analysis of septum formation during a time course of appressorium development. Conidial suspensions were prepared from the *M. oryzae* SEP1-1, SEP1-9 and H1:RFP strains and incubated in conditions inductive for appressorium development in the absence (A) or presence (B) of sodium acetate. The number of septa that formed in the germ tube was determined through calcofluor white staining and epifluorescence microscopy at various time points during germination and appressorium morphogenesis. Error bars are 1 standard error.

**Supplemental Table 1 *Magnaporthe oryzae* strains used in this study.**

| <b>Strain</b> | <b>Genotype</b>       | <b>Reference</b>      |
|---------------|-----------------------|-----------------------|
| H1:eRFP       | <i>grg(p):H1:eRFP</i> | Saunders et al., 2010 |
| Guy-11        |                       | Leung et al., 1988    |
| DF51          | <i>ΔcpkA</i>          | Xu et al., 1997       |
| MK23          | <i>Δmst12</i>         | Park et al., 2002     |
| <i>nn95</i>   | <i>Δpmk1</i>          | Xu and Hamer, 1996    |

**Supplemental Table 2 *Magnaporthe oryzae* strains generated in this study.**

| Strain background | Generated strains                                 | Description                                                                                                                                           |
|-------------------|---------------------------------------------------|-------------------------------------------------------------------------------------------------------------------------------------------------------|
| H1:eRFP           | <i>tpmA:eGFP</i>                                  | H1:RFP strain expressing <i>tpmA:eGFP</i> fusion protein; <i>tpmA</i> from <i>Aspergillus nidulans</i> (strain denoted <i>tpmA:GFP</i> )              |
| H1:eRFP           | <i>SEP4:eGFP</i>                                  | H1:RFP strain expressing <i>SEP4:eGFP</i> fusion protein (strain denoted <i>SEP4:GFP</i> ).                                                           |
| H1:eRFP           | <i>SEP5:eGFP</i>                                  | H1:RFP strain expressing <i>SEP5:eGFP</i> fusion protein (strain denoted <i>SEP5:GFP</i> ).                                                           |
| DF51              | $\Delta cpkA$ ; <i>H1:RFP</i> ; <i>tpmA:eGFP</i>  | $\Delta cpkA$ strain expressing H1:RFP and <i>tpmA:eGFP</i> fusion proteins; <i>H1</i> from <i>N. crassa</i> and <i>tpmA</i> from <i>A. nidulans</i>  |
| MK23              | $\Delta mst12$ ; <i>H1:RFP</i> ; <i>tpmA:eGFP</i> | $\Delta mst12$ strain expressing H1:RFP and <i>tpmA:eGFP</i> fusion proteins; <i>H1</i> from <i>N. crassa</i> and <i>tpmA</i> from <i>A. nidulans</i> |
| $\Delta pmk1$     | $\Delta pmk1$ ; <i>H1:RFP</i> ; <i>tpmA:eGFP</i>  | $\Delta pmk1$ strain expressing H1:RFP and <i>tpmA:eGFP</i> fusion proteins; <i>H1</i> from <i>N. crassa</i> and <i>tpmA</i> from <i>A. nidulans</i>  |
| Guy-11            | <i>sep1</i> <sup>G849R</sup> +/- <i>H1:RFP</i>    | Strain expressing the <i>Mosep1</i> <sup>G849R</sup> temperature sensitive allele; the H1:RFP fusion protein was added post-transformation            |
| H1:eRFP           | <i>H1:RFP</i> ; <i>ICL1(p)</i> ; <i>sep1</i>      | H1:RFP strain expressing <i>SEP1</i> under acetate inducible expression (strain denoted <i>SEP1</i> )                                                 |

**Supplemental Table 3. Detailed information of the primers used in this study.**

| Primer name        | Primer sequence <sub>1</sub>                                       | Strand | Annealing Temp. (°C) | Template                                                     |
|--------------------|--------------------------------------------------------------------|--------|----------------------|--------------------------------------------------------------|
| 5SU                | 5'T CGA CGT GCC AAC GCC ACA G3'                                    | +      | 62                   | pCB1532<br>(Sweigard et al., 1997)                           |
| 3SU                | 5'T CGA CGT GAG AGC ATG CAA TTC3'                                  | -      | 62                   | pCB1532                                                      |
| SEP4-F             | 5'GATTATTGCACGGGAATTGCATGCTC<br>TCACCTAGTTACTGGACTAGCCTAGAC<br>G3' | +      | 62                   | Guy-11 genomic<br>DNA                                        |
| SEP4-R             | 5'GGTGAACAGCTCCTCGCCCTTGCTC<br>ACCATGTAGCCATTCATAGTCATCCTT<br>TG3' | -      | 62                   | Guy-11 genomic<br>DNA                                        |
| SEP5-F             | 5'GATTATTGCACGGGAATTGCATGCTC<br>TCACCGGTCTGCGCACCAGCGTTACC<br>AG3' | +      | 62                   | Guy-11 genomic<br>DNA                                        |
| SEP5-R             | 5'GGTGAACAGCTCCTCGCCCTTGCTC<br>ACCATGTTGCCGTCTTCCCCGTTGCC<br>TC3'  | -      | 62                   | Guy-11 genomic<br>DNA                                        |
| 5SepH-ts1-<br>KpnI | 5'AAg gta ccA TGA CAC CCC CGG GAG<br>GCT TTG3'                     | +      | 65                   | Guy-11 genomic<br>DNA                                        |
| 3SepH-KpnI         | 5'AAg gta ccG TGG AGT CGA AAG GAT<br>TGC C3'                       | -      | 65                   | Guy-11 genomic<br>DNA                                        |
| 3SepH-ts1-<br>NotI | 5'AAg cgg ccg cGT GGA GTC GAA AGG<br>ATT GCC3'                     | -      | 65                   | Guy-11 genomic<br>DNA                                        |
| 5SU-ts-NotI        | 5'AAg cgg ccg cGT CGA CGT GCC AAC<br>GCC ACA G3'                   | +      | 65                   | pCB1532                                                      |
| 3SU-ts-NotI        | 5'AAg cgg ccg cGT CGA CGT GAG AGC<br>ATG CAA TTC3'                 | -      | 65                   | pCB1532                                                      |
| 5SepH-ts2-<br>NotI | 5'AAg cgg ccg cTT TAG CGG GAA ATA<br>GCT CCG3'                     | +      | 65                   | Guy-11 genomic<br>DNA                                        |
| 3SepH-ts2-<br>XbaI | 5'AAt cta gaC GGA CAT GGA GAG CGT<br>CCA GG3'                      | -      | 65                   | Guy-11 genomic<br>DNA                                        |
| 5SepH-ts3-<br>NdeI | 5'AAc ata tgA TCT TGC AGC TGC TC3'                                 | +      | 65                   | Guy-11 genomic<br>DNA                                        |
| 5SepH-<br>mutant   | 5'GTT CGT CAG CGC TGG TCG <b>ACT</b><br>GAA CGT CCT TG3'           | +      | -                    | Guy-11 genomic<br>DNA                                        |
| 5ICL1P-NotI        | 5'AAg cgg ccg cGA ATT CGT CCA GTA<br>ATC AAA G3'                   | +      | 65                   | <i>ICL1(p):sGFP</i><br>gene fusion<br>(Wang et al.,<br>2003) |
| 3ICL1P-SepH        | 5'CAA AGC CTC CCG GGG GTG TCA<br>TCT CGG GAA TAT GGT TCT TAC G3'   | -      | 65                   | <i>ICL1(p):sGFP</i>                                          |
| 5SepH-ICL1P        | 5'CGT AAG AAC CAT ATT CCC GAG<br>ATG ACA CCC CCG GGA GGC TTT G3'   | +      | 62                   | Guy-11 genomic<br>DNA                                        |
| 3SepH-NotI         | 5'AAg cgg ccg cTC CTC ATC TAC CCC<br>AGA ATT C3'                   | -      | 62                   | Guy-11 genomic<br>DNA                                        |

<sup>1</sup>Lowercase denotes restriction endonuclease recognition sequences and bold font signifies nucleotide substitutions.
