# Supplementary material
Source: PubMed Central journal article supplement (PMC2929119)
Supplement: tpc.110.074492_2.pdf [file tpc.110.074492_2.pdf]

**Supplemental Movie 1.** Live cell imaging of closed mitosis during appressorium development in *M. oryzae*.

Movie of nuclear division occurring during appressorium development. A conidial suspension was prepared from the *M. oryzae* H1:RFP strain and incubated in conditions to allow appressorium development. A 10  $\mu$ M aliquot of 3,3'-dihexyloxycarbocyanine iodide (DiOC<sub>6</sub>) was added 4-6 hours post-inoculation and images acquired at 10 second intervals with sequential excitation at the two wavelengths.

**Supplemental Movie 2.** Live cell imaging of actomyosin ring formation during the asymmetric cellular division associated with appressorium development in *M. oryzae*.

Movie to show position and formation of the actomyosin contractile ring and septum during appressorium development. A conidial suspension was prepared from the *M. oryzae* tpmA:GFP strain and the suspension was incubated to allow appressorium development. Actomyosin ring formation was observed 4-6 hours post-inoculation and images were acquired at 15 second intervals.
